# Supplementary material
Source: PubMed Central journal article supplement (PMC7887723)
Supplement: gbaa007_suppl_supplementary_materials.pdf [file gbaa007_suppl_supplementary_materials.pdf]

Supplementary Table 1

*Tukey Pairwise Comparisons for Different Types of Relationships Predicting Pleasantness of Encounters and Stressful Experiences*

| (I)<br>Relationship Type | (J)<br>Relationship Type | Pleasantness           |      | Stressful experiences  |      |
|--------------------------|--------------------------|------------------------|------|------------------------|------|
|                          |                          | Mean Differences (I-J) | SE   | Mean Differences (I-J) | SE   |
| Romantic partners        | Family members           | 0.01                   | 0.02 | 0.36***                | 0.10 |
|                          | Other social partners    | 0.20***                | 0.02 | 0.83***                | 0.10 |
| Family members           | Other social partners    | 0.18***                | 0.01 | 0.47***                | 0.09 |

\* $p < .05$ . \*\* $p < .01$ . \*\*\* $p < .001$ .

Supplementary Table 2

*Pairwise Comparisons Using t-tests for Different Types of Relationships Predicting Older Adults' Mood*

| Relationship types in comparison |                       | Positive mood |           | Negative mood |           |
|----------------------------------|-----------------------|---------------|-----------|---------------|-----------|
|                                  |                       | <i>B</i>      | <i>SE</i> | <i>B</i>      | <i>SE</i> |
| Friend                           | Romantic partners     | 0.05          | 0.03      | -0.02         | 0.02      |
|                                  | Family members        | 0.02          | 0.02      | -0.03*        | 0.01      |
|                                  | Other social partners | 0.08***       | 0.02      | -0.02         | 0.01      |
| Romantic partners                | Family members        | -0.02         | 0.03      | -0.01         | 0.02      |
|                                  | Other social partners | 0.03          | 0.03      | 0.00          | 0.02      |
| Family members                   | Other social partners | 0.06***       | 0.02      | 0.01          | 0.01      |

\* $p < .05$ . \*\* $p < .01$ . \*\*\* $p < .001$ .

Supplementary Table 3

*Pairwise Comparisons Using t-tests for Different Closeness of Friendships and Different Types of Social Relationships Predicting Older Adults' Mood*

| Different relationships in comparison |                       | Positive mood |           | Negative mood |           |
|---------------------------------------|-----------------------|---------------|-----------|---------------|-----------|
|                                       |                       | <i>B</i>      | <i>SE</i> | <i>B</i>      | <i>SE</i> |
| Social convoy friends                 | Non-convoy friends    | -0.07**       | 0.02      | 0.03          | 0.02      |
|                                       | Romantic partners     | -0.00         | 0.03      | 0.00          | 0.02      |
|                                       | Family members        | -0.03         | 0.02      | -0.01         | 0.01      |
|                                       | Other social partners | 0.03          | 0.02      | 0.00          | 0.01      |
| Non-convoy friends                    | Romantic partners     | 0.06*         | 0.03      | -0.03         | 0.02      |
|                                       | Family members        | 0.04          | 0.02      | -0.04***      | 0.01      |
|                                       | Other social partners | 0.10***       | 0.02      | -0.03**       | 0.01      |
| Romantic partners                     | Family members        | -0.03         | 0.03      | -0.01         | 0.02      |
|                                       | Other social partners | 0.03          | 0.03      | 0.00          | 0.02      |
| Family members                        | Other social partners | 0.06***       | 0.02      | 0.01          | 0.01      |

\* $p < .05$ . \*\* $p < .01$ . \*\*\* $p < .001$ .

Supplementary Table 4

*Multilevel Linear Models Predicting Older Adults' Pleasantness throughout the Day from Encounters with Friends: Relationship*

*Status as a Moderator*

| Variable                                                                | Pleasantness |           |
|-------------------------------------------------------------------------|--------------|-----------|
|                                                                         | <i>B</i>     | <i>SE</i> |
| <b>Fixed effects</b>                                                    |              |           |
| Intercept                                                               | 4.50***      | 0.04      |
| Encounters with friends <sup>a</sup>                                    | 0.17***      | 0.02      |
| Relationship status                                                     | 0.12*        | 0.06      |
| Encounters with friends <sup>a</sup> × relationship status <sup>b</sup> | -0.06*       | 0.03      |
| <u>Covariates</u>                                                       |              |           |
| Age <sup>c</sup>                                                        | 0.00         | 0.00      |
| Gender <sup>c</sup>                                                     | -0.04        | 0.05      |
| Education <sup>c</sup>                                                  | -0.02        | 0.02      |
| Health <sup>c</sup>                                                     | 0.10**       | 0.03      |
| Minority status <sup>c</sup>                                            | 0.08         | 0.06      |
| % of friends in social convoy <sup>c</sup>                              | 0.07         | 0.13      |
| In-person contact <sup>d</sup>                                          | 0.08***      |           |
| <b>Random effects</b>                                                   |              |           |
| Intercept VAR (Level 2: Assessment)                                     | 0.17***      | 0.01      |
| Intercept VAR (Level 3: Participant)                                    | 0.15***      | 0.01      |
| Residual VAR                                                            | 0.32***      | 0.00      |
| -2 log likelihood                                                       | 34471.3      |           |

Notes. Assessments  $n = 6,262$  from 313 participants.

<sup>a</sup>Had social encounters with friends 1 (yes) and 0 (no). <sup>b</sup>Coded as 1 (married/cohabitated) and 0 (not married/cohabitated).

<sup>c</sup>Participant-level covariates. <sup>d</sup>Encounter-level covariates.

\* $p < .05$ . \*\* $p < .01$ . \*\*\* $p < .001$ .

Supplementary Table 5

*Multilevel Linear Models Predicting Older Adults' Mood throughout the Day from Encounters with Friends: Relationship Status as a**Moderator*

| Variable                                                                | Positive mood |           | Negative mood |           |
|-------------------------------------------------------------------------|---------------|-----------|---------------|-----------|
|                                                                         | <i>B</i>      | <i>SE</i> | <i>B</i>      | <i>SE</i> |
| <b>Fixed effects</b>                                                    |               |           |               |           |
| Intercept                                                               | 3.31***       | 0.08      | 1.20***       | 0.03      |
| Encounters with friends <sup>a</sup>                                    | 0.12***       | 0.02      | -0.02         | 0.01      |
| Relationship status <sup>b</sup>                                        | 0.17**        | 0.11      | 0.02          | 0.05      |
| Encounters with friends <sup>a</sup> × relationship status <sup>b</sup> | -0.09***      | 0.03      | 0.02          | 0.02      |
| Encounters with family members <sup>c</sup>                             | 0.05***       | 0.01      | 0.02**        | 0.01      |
| Encounters with other social partners <sup>d</sup>                      | -0.01         | 0.01      | 0.01          | 0.01      |
| <u>Covariates</u>                                                       |               |           |               |           |
| Age <sup>e</sup>                                                        | -0.01         | 0.01      | -0.00         | 0.00      |
| Gender <sup>e</sup>                                                     | -0.08         | 0.09      | 0.04          | 0.04      |
| Education <sup>e</sup>                                                  | -0.03         | 0.03      | 0.00          | 0.01      |
| Health <sup>e</sup>                                                     | 0.12**        | 0.04      | -0.09***      | 0.02      |
| Minority status <sup>e</sup>                                            | 0.10          | 0.10      | -0.04         | 0.04      |
| % of friends in social convoy <sup>e</sup>                              | 0.16          | 0.21      | 0.01          | 0.09      |
| % of in-person contact <sup>f</sup>                                     | 0.30***       | 0.21      | -0.14         | 0.09      |
| Diverse activity <sup>f</sup>                                           | 0.02***       | 0.00      | 0.00          | 0.00      |
| <b>Random effects</b>                                                   |               |           |               |           |
| Intercept VAR (Level 2: Participant)                                    | 0.47***       | 0.04      | 0.08***       | 0.01      |
| Residual VAR                                                            | 0.17***       | 0.00      | 0.06***       | 0.00      |
| -2 log likelihood                                                       | 7555.3        |           | 1411.8        |           |

*Notes.* Assessments  $n = 6,262$  from 313 participants. Encounters with romantic partners were not included in the model due to high correlation with relationship status.

<sup>a</sup>Had social encounters with friends 1 (*yes*) and 0 (*no*). <sup>b</sup>Coded as 1 (*married/cohabitated*) and 0 (*not married/cohabitated*). <sup>c</sup>Had social encounters with family members 1 (*yes*) and 0 (*no*). <sup>d</sup>Had social encounters with other social partners 1 (*yes*) and 0 (*no*). <sup>e</sup>Participant-level covariates. <sup>f</sup>Assessment-level covariates.

\* $p < .05$ . \*\* $p < .01$ . \*\*\* $p < .001$ .

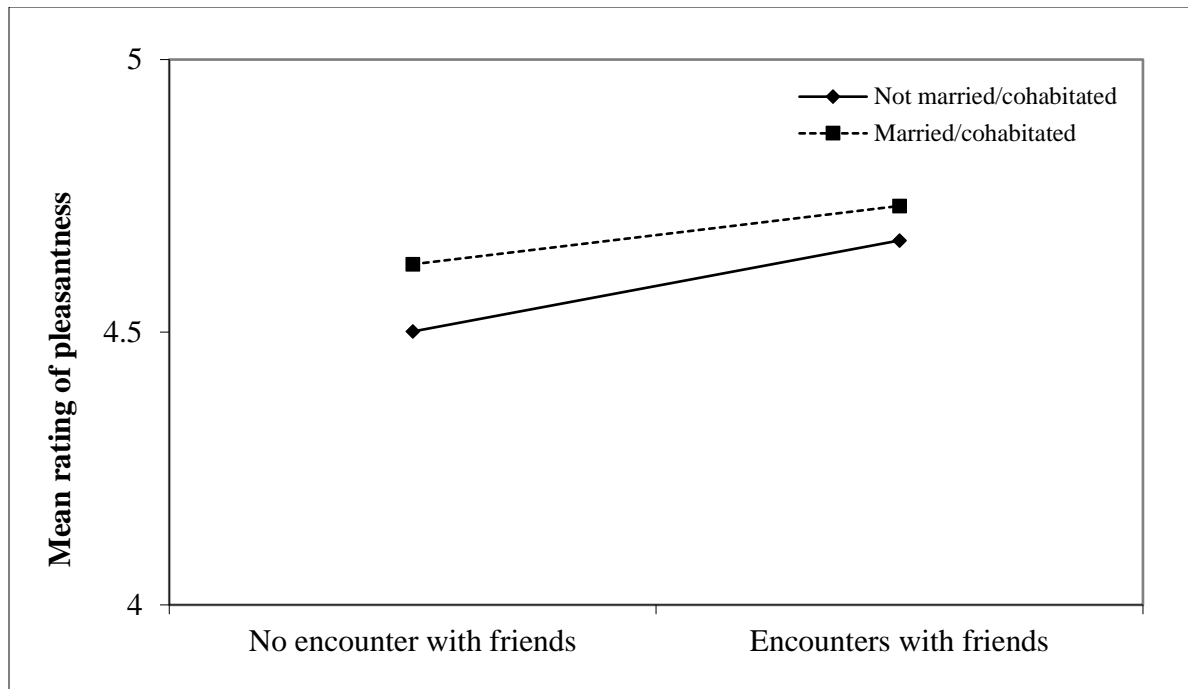

*Supplementary Figure 1.* Interaction effects of encounters with friends  $\times$  relationship status on older adults' rating of pleasantness throughout the day.

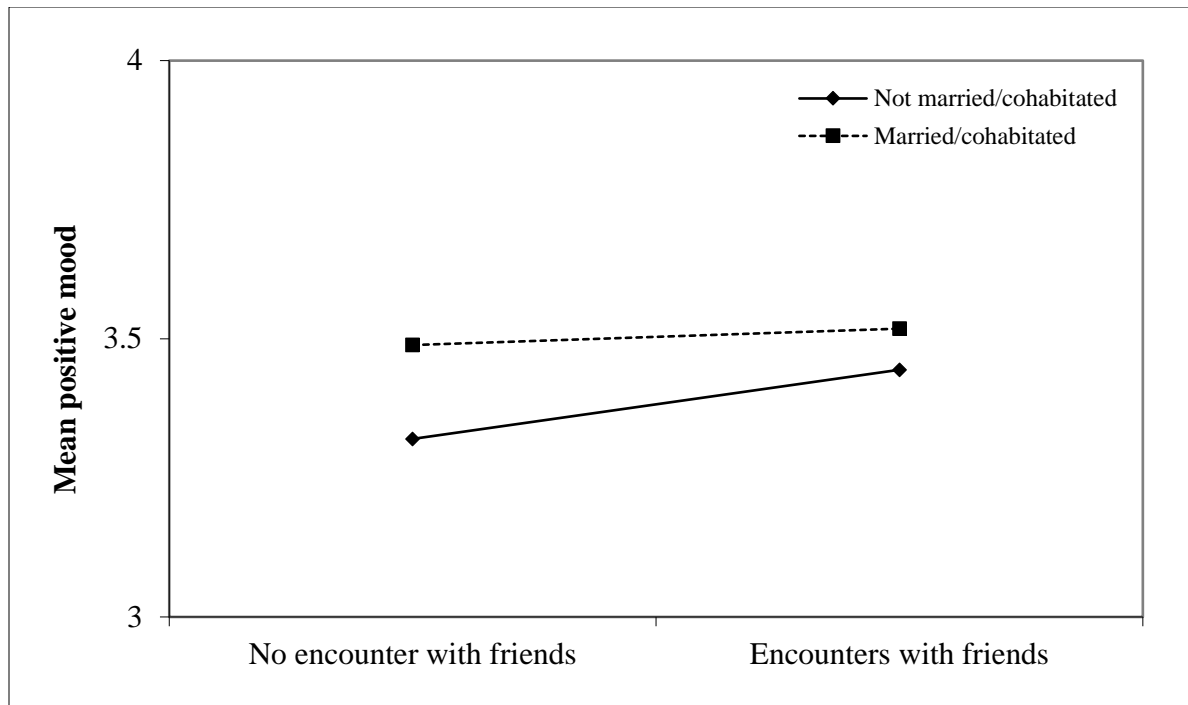

*Supplementary Figure 2.* Interaction effects of encounters with friends  $\times$  relationship status on older adults' positive mood throughout the day.
